# Supplementary material for: The Major Birch Pollen Allergen Bet v 1 Induces Different Responses in Dendritic Cells of Birch Pollen Allergic and Healthy Individuals
Source: PubMed Central journal article supplement (PMC4311984; doi:10.1371/journal.pone.0117904), 2015-01-30
Supplement: pone.0117904.s001.pdf [file pone.0117904.s001.pdf]

**S1 Table.** Characteristics of birch pollen allergic patients.

| Patient | Sex | Age [years] | Total IgE [kU/L] | Allergen-specific IgE |                                            |                                            | Symptoms <sup>a</sup> |             | Sensitizations to plant foods <sup>b</sup> |                 | Sensitization to other aeallergens <sup>c</sup> |                             |
|---------|-----|-------------|------------------|-----------------------|--------------------------------------------|--------------------------------------------|-----------------------|-------------|--------------------------------------------|-----------------|-------------------------------------------------|-----------------------------|
|         |     |             |                  | Birch [CAP class]     | Bet v 1.0101 [ELISA OD <sub>405 nm</sub> ] | Api g 1.0101 [ELISA OD <sub>405 nm</sub> ] | Birch pollen          | Plant foods | sIgE [CAP class]                           | Skin prick test | sIgE [CAP class]                                | Skin prick test             |
| AD1     | m   | 28          | 4155             | 5                     | 1.4                                        | 0.1                                        | RC                    | OAS, AD     | Ap=3; Am=1; Pe=3; Pn=1; Sy=1               | Ap, Ca          | D=1; G=4; H=2; Hz=2; M=1                        |                             |
| AD2     | m   | 40          | 393              | 3                     | 0.4                                        | 0.1                                        | RC                    | OAS         | Ce=1; Pe=1; Pn=1                           | Ap, Ca, Ce      | G=2; Hz=1; O=1                                  |                             |
| AD3     | f   | 30          | 38               | 3                     | 0.7                                        | 0.0                                        | A, RC                 | OAS         | Sy=2                                       | Ap, Ce, Pe      | Al=3; G=3                                       |                             |
| AD4     | m   | 27          | 47               | 3                     | 1.0                                        | 0.0                                        | A, RC                 | OAS         |                                            |                 | G=4; Hz=3; Ra=2                                 | Al, C, D, H, Mo, Mu, Ra, Ry |
| AD5     | m   | 40          | 444              | 5                     | 3.8                                        | 0.2                                        | RC                    | OAS         |                                            |                 | C=3; G=4; Ry=4; M=3                             |                             |
| AD6     | f   | 28          | 155              | 4                     | 2.7                                        | 0.1                                        | RC                    | OAS         |                                            | Ho              | G=2                                             | G                           |
| AD7     | m   | 49          | 250              | 4                     | 2.1                                        | 0.1                                        | RC                    | OAS         | Ap=2; Hn=2                                 |                 | G=2                                             |                             |
| AD8     | f   | 32          | NA               | 4                     | 2.7                                        | 0.0                                        | RC                    | OAS         | Pn=1                                       |                 | G=2; Ra=2; M=1; Al=2                            |                             |

<sup>a</sup> A = asthma; AD = atopic dermatitis; OAS = oral allergy syndrome; RC = rhinoconjunctivitis

<sup>b</sup> Am = Almond; Ap = apple; Ca = carrot; Ce = celery; Hn = hazelnut; Ho = honey; Pe = peach; Pn = peanut; Sy = soy

<sup>c</sup> Al = *Alternaria*; C = cat; D = dog; G = grass pollen; H = horse; Hz = hazel pollen; M = house dust mites; Mu = mugwort pollen; Mo = mold; O = olive pollen; Ra = ragweed pollen; Ry = rye pollen

NA = Not available
