# Supplementary material for: The Major Birch Pollen Allergen Bet v 1 Induces Different Responses in Dendritic Cells of Birch Pollen Allergic and Healthy Individuals
Source: PubMed Central journal article supplement (PMC4311984; doi:10.1371/journal.pone.0117904), 2015-01-30
Supplement: pone.0117904.s002.pdf [file pone.0117904.s002.pdf]

**S2 Table. Primer sequences used for real-time PCR analysis.** NCBI accession number, gene symbol and synonym, sequences of forward (F) and reverse (R) primers.

| No                                                           | Symbol | Synonym                          | Acc. no.  | Primer sequences                                              |
|--------------------------------------------------------------|--------|----------------------------------|-----------|---------------------------------------------------------------|
| <b>Bet v 1 regulated genes from the gene signature array</b> |        |                                  |           |                                                               |
| 1                                                            | IL3    |                                  | NM_000588 | F: TTGCCTTTGCTGGACTTCAA<br>R: TTGAATGCCTCCAGGTTTGG            |
| 2                                                            | IL4    |                                  | NM_172348 | F: CGACTGCACAGCAGTTCCA<br>R: CTCTGGTTGGCTTCCTTCA              |
| 3                                                            | IL5    | TRF                              | NM_000879 | F: TGCTGATAGCCAATGAGACTCTGA<br>R: AGTGTGCCTATTCCTGAAAGATT     |
| 4                                                            | IL13   | ALRH<br>BHR1                     | NM_002188 | F: ACCTGACAGCTGGCATGTACTG<br>R: TGGGTCTTCTCGATGGCACT          |
| 5                                                            | CXCL10 | INP10<br>SCYB10                  | NM_001565 | F: AAGCAGTTAGCAAGGAAAGGTCTAA<br>R: AGCCTCTGTGTGGTCCATCC       |
| 6                                                            | CXCL11 | ITAC<br>SCYB11<br>SCYB9B         | NM_005409 | F: GTGTGCTACAGTTGTTCAAGGCTTC<br>R: TTACCCAGGGCCTATGCAA        |
| <b>Markers of early cell activation</b>                      |        |                                  |           |                                                               |
| 7                                                            | EGR-1  | KROX24<br>NGFIA<br>ZIF268        | NM_001964 | F: TGAACGCAAGAGGCATACCA<br>R: AAGCAGGGGGAACAGAGGA             |
| 8                                                            | EGR-2  | KROX20                           | NM_000399 | F: GCAAATGATGACCGCCAAG<br>R: GGATATGGGAGATCCAACGAC            |
| 9                                                            | EGR-3  | PILOT                            | NM_004430 | F: CAATCTGTACCCCGAGGAG<br>R: TGGTCAGACCGATGTCCATTAC           |
| <b>Genes used to study Fcε receptor activation</b>           |        |                                  |           |                                                               |
| 10                                                           | IL1β   | IL1F2                            | NM_000576 | F: GTACCTGAGCTCGCCAGTGA<br>R: TCGGAGATTCGTAGCTGGATG           |
| 11                                                           | IL6    | IFNB2                            | NM_000600 | F: GTACATCCTCGACGGCATCTC<br>R: GGCAAGTCTCCTCATTGAATC          |
| 12                                                           | TNFα   | TNFSF2                           | NM_000594 | F: ATGTTGTAGCAAACCCTCAAGCT<br>R: TTGGCCAGGAGGGCATT            |
| <b>Fcε receptor genes</b>                                    |        |                                  |           |                                                               |
| 14                                                           | FcεRIα | FcERI                            | NM_002001 | F: CATGGAATCCCCTACTCTACTGTGT<br>R: CCTTAGGTTTCTGAGGGACTGCTA   |
| 15                                                           | FcεRIβ | MS4A2                            | NM_000139 | F: GAGAAATGCAACATATCTGGTGAGAG<br>R: AGGTTGATGATCAGGATGGTAATTC |
| 16                                                           | FcεRIγ |                                  | NM_004106 | F: TCTACTGTCGACTGAAGGTAATCCA<br>R: GAGTCTCGTAAGTCTCCTGGTTCCT  |
| 17                                                           | CD23   | FCER2<br>CLEC4J<br>FCE2<br>IGEBF | NM_002002 | F: AGGTGTCCAGCGGCTTTGT<br>R: AGCACTCCGTTGGAAATTGA             |

| No                          | Symbol  | Synonym          | Acc. no.       | Primer sequences                                              |
|-----------------------------|---------|------------------|----------------|---------------------------------------------------------------|
| <b>Lineage marker genes</b> |         |                  |                |                                                               |
| 30                          | CD3E    |                  | NM_000733.3    | F: CTGGCGGCAGGCAAAGG<br>R: TTCCGGATGGGCTCATAGTCT              |
| 31                          | CD14    |                  | NM_000591.3    | F: CGGAAGACTTATCGACCATGGA<br>R: GACGCAGCGGAAATCTTCA           |
| 32                          | CD19    | B4 CVID3         | NM_001178098.1 | F: TGACCCCACCAGGAGATTCTT<br>R: CACGTTCCCGTACTGGTTCTG          |
| 33                          | CD20    | MS4A1<br>B1      | NM_021950.3    | F: CACTCTTCAGGAGGATGTCTTCAC<br>R: GACAGCCCCCAAAGTCTTAGATT     |
| 34                          | CD40    | CDW40<br>TNFRSF5 | NM_001250.4    | F: TGCCAGCCAGGACAGAAAC<br>R: TGTGTCTCTCTGTTCCAGGTGTCT         |
| 35                          | CD80    | B7-1<br>CD28LG   | NM_005191.3    | F: ACATCACCATCCAAGTGTCCATAC<br>R: TAACACCTGAACAGAAGTGAGAAAGAC |
| 36                          | HLA-DRA |                  | NM_019111.4    | F: GCCCTGGGCCTGACTGT<br>R: CATCACCTCCATGTGCCTTACA             |
| <b>Housekeeping genes</b>   |         |                  |                |                                                               |
| 37                          | EF1A    | EEF1A1           | NM_001402      | F: ATTACAGGGACATCTCAGGCTGAC<br>R: CATTCTTGGAGATACCAGCTTCAA    |
| 38                          | UBC     |                  | NM_021009      | F: ATTTGGGTCGCAGTTCTTG<br>R: TGCCTTGACATTCTCGATGGT            |
