# Supplementary material for: The Major Birch Pollen Allergen Bet v 1 Induces Different Responses in Dendritic Cells of Birch Pollen Allergic and Healthy Individuals
Source: PubMed Central journal article supplement (PMC4311984; doi:10.1371/journal.pone.0117904), 2015-01-30
Supplement: pone.0117904.s003.pdf [file pone.0117904.s003.pdf]

**S3 Table. Expression pattern of lineage markers in iMoDCs of BP allergic and normal donors assayed by flow cytometry.** The values are mean  $\pm$  standard deviation (SD) of 7 independent donors within each group.

| <b>BP allergic group</b>  | <b>CD3</b> | <b>CD14</b> | <b>CD20</b> | <b>CD16</b> | <b>CD56</b> | <b>CD11c</b> |
|---------------------------|------------|-------------|-------------|-------------|-------------|--------------|
| mean % pos. cells         | 1.4        | 0.4         | 8.2         | 75.5        | 0.4         | 87.4         |
| $\pm$ SD                  | 0.8        | 0.2         | 1.4         | 8.2         | 0.5         | 3.6          |
| <b>Normal donor group</b> | <b>CD3</b> | <b>CD14</b> | <b>CD20</b> | <b>CD16</b> | <b>CD56</b> | <b>CD11c</b> |
| mean % pos. cells         | 1.2        | 0.4         | 5.5         | 78.3        | 0.5         | 88.9         |
| $\pm$ SD                  | 0.4        | 0.5         | 2.4         | 11.2        | 0.3         | 4.9          |
