# Supplementary material for: The Major Birch Pollen Allergen Bet v 1 Induces Different Responses in Dendritic Cells of Birch Pollen Allergic and Healthy Individuals
Source: PubMed Central journal article supplement (PMC4311984; doi:10.1371/journal.pone.0117904), 2015-01-30
Supplement: pone.0117904.s004.pdf [file pone.0117904.s004.pdf]

**S4 Table. Differentially expressed genes after allergen stimulation of cells from a BP allergic**

**(A) and a normal donor (B).** cDNA was synthesized from mRNA isolated 2.5 h and 4 h after allergen stimulation, pooled and analyzed for expression of 96 genes using the Human Immune Array. Genes whose expression changed by at least 3-fold compared with the baseline levels of unstimulated cells (Bet v 1 vs. unstimulated) or MFs (Bet v 1 + MFs vs. MFs) are shown in bold.

**A**

| <b>Gene</b>          | <b>Relative expression</b>      |                              |
|----------------------|---------------------------------|------------------------------|
|                      | <b>Bet v 1 vs. unstimulated</b> | <b>Bet v 1 + MFs vs. MFs</b> |
| IL3-Hs00174117_m1    | <b>4.24</b>                     | <b>14.04</b>                 |
| IL4-Hs00174122_m1    | <b>6.60</b>                     | <b>11.67</b>                 |
| IL5-Hs00174200_m1    | 1.07                            | <b>7.55</b>                  |
| IL13-Hs00174379_m1   | <b>267.11</b>                   | <b>23.54</b>                 |
| CXCL10-Hs00171042_m1 | <b>0.29</b>                     | 1.03                         |
| CXCL11-Hs00171138_m1 | <b>0.17</b>                     | 2.40                         |

**B**

| <b>Gene</b>          | <b>Relative expression</b>      |                              |
|----------------------|---------------------------------|------------------------------|
|                      | <b>Bet v 1 vs. unstimulated</b> | <b>Bet v 1 + MFs vs. MFs</b> |
| IL3-Hs00174117_m1    | 1.13                            | 0.80                         |
| IL4-Hs00174122_m1    | 1.08                            | 2.10                         |
| IL5-Hs00174200_m1    | 1.13                            | 0.80                         |
| IL13-Hs00174379_m1   | 1.13                            | <b>0.31</b>                  |
| CXCL10-Hs00171042_m1 | <b>3.52</b>                     | 1.16                         |
| CXCL11-Hs00171138_m1 | <b>7.00</b>                     | <b>3.56</b>                  |
