# Supplementary material for: The Major Birch Pollen Allergen Bet v 1 Induces Different Responses in Dendritic Cells of Birch Pollen Allergic and Healthy Individuals
Source: PubMed Central journal article supplement (PMC4311984; doi:10.1371/journal.pone.0117904), 2015-01-30

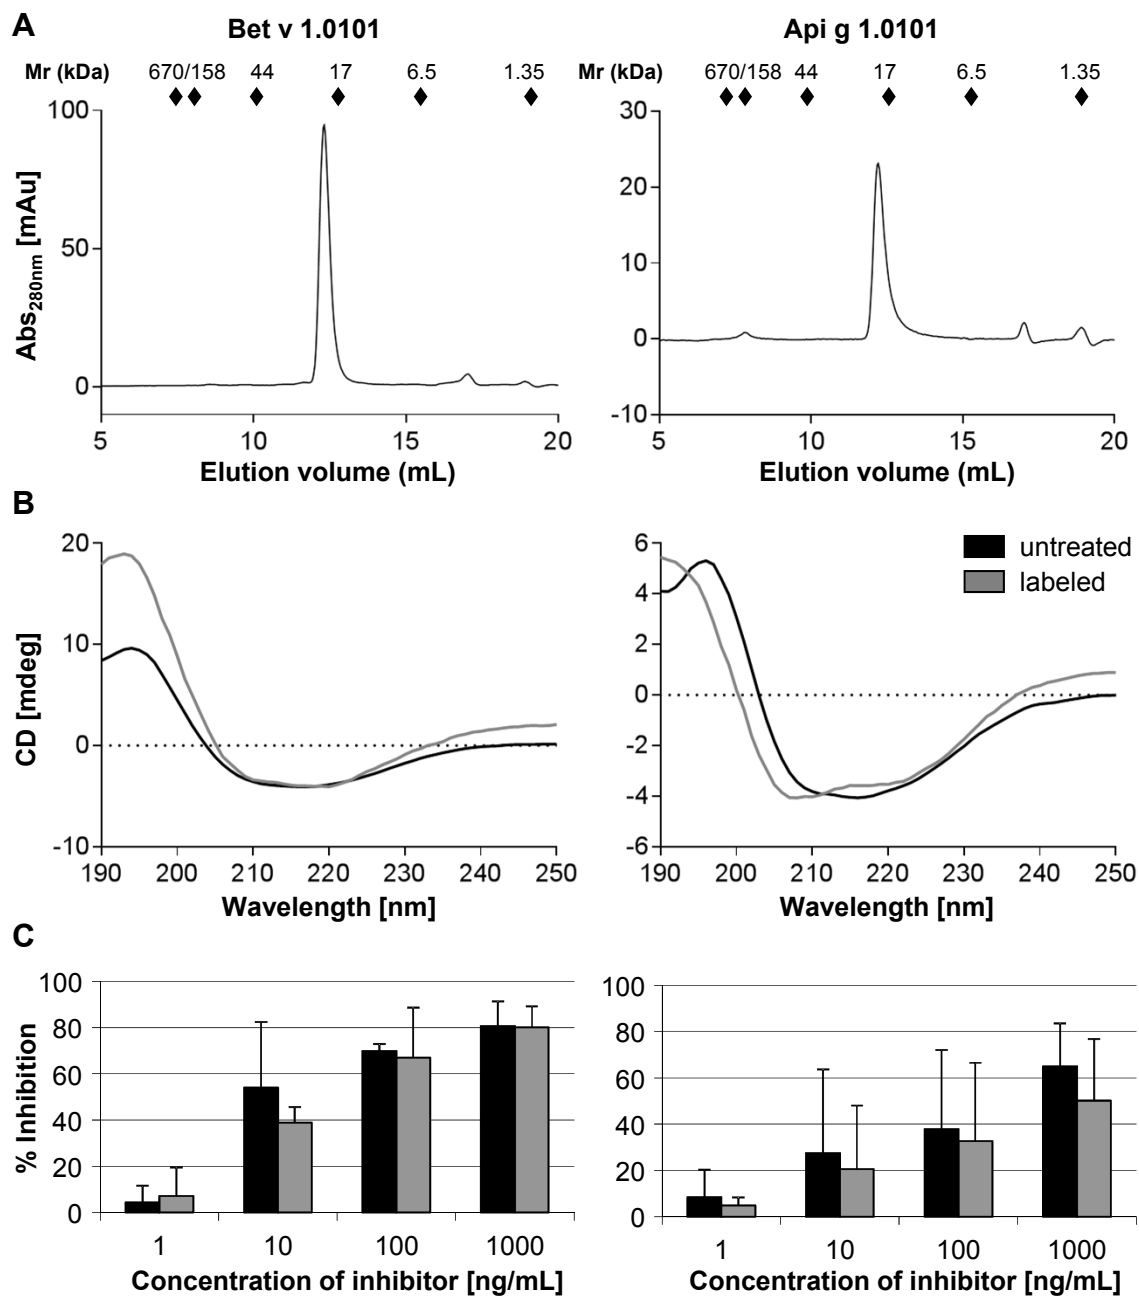

Supplement: pone.0117904.s005.pdf [file pone.0117904.s005.pdf]
