# Supplementary material for: The Major Birch Pollen Allergen Bet v 1 Induces Different Responses in Dendritic Cells of Birch Pollen Allergic and Healthy Individuals
Source: PubMed Central journal article supplement (PMC4311984; doi:10.1371/journal.pone.0117904), 2015-01-30
Supplement: pone.0117904.s006.pdf [file pone.0117904.s006.pdf]

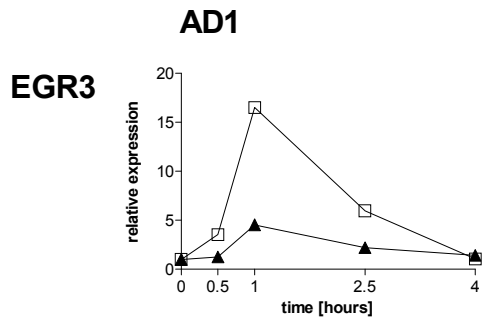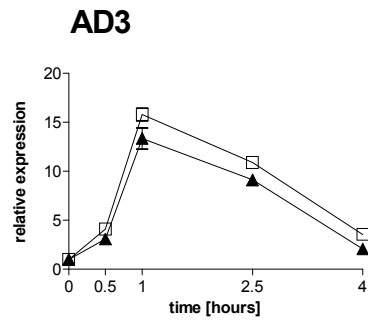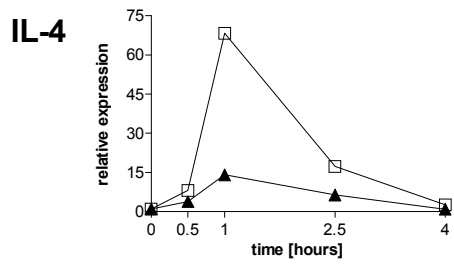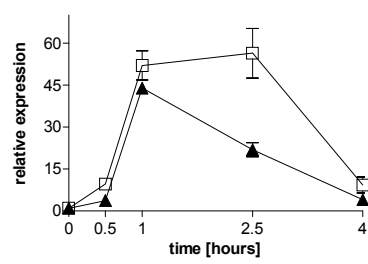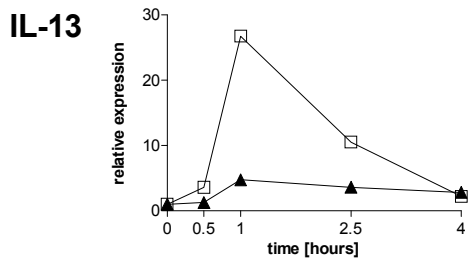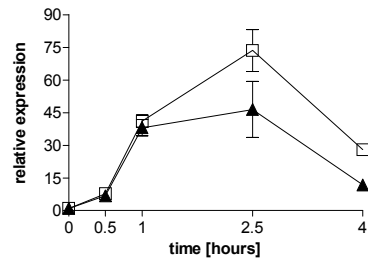

□ Bet v 1    ▲ Api g 1
