# Supplementary material for: The Major Birch Pollen Allergen Bet v 1 Induces Different Responses in Dendritic Cells of Birch Pollen Allergic and Healthy Individuals
Source: PubMed Central journal article supplement (PMC4311984; doi:10.1371/journal.pone.0117904), 2015-01-30
Supplement: pone.0117904.s007.pdf [file pone.0117904.s007.pdf]

### CXCL10

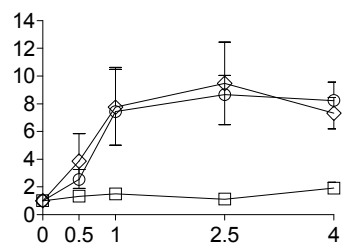

### CXCL11

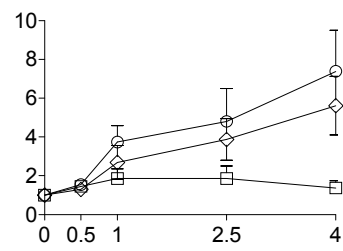

□ Bet v 1   ○ MFs   ◇ Bet v 1 + MFs
